# Genetic Variation in Adaptability and Pleiotropy in Budding Yeast

Elizabeth R. Jerison<sup>1,2,3\*</sup>, Sergey Kryazhimskiy<sup>4\*</sup>, James Mitchell<sup>2</sup>, Joshua S. Bloom<sup>5</sup>, Leonid Kruglyak<sup>5</sup>, Michael M. Desai<sup>1,2,3†</sup>

<sup>1</sup>Department of Organismic and Evolutionary Biology, <sup>2</sup>Department of Physics, and <sup>3</sup>FAS Center for Systems Biology, Harvard University, Cambridge, MA, USA. <sup>4</sup>Section of Ecology, Behavior and Evolution, Division of Biological Sciences, University of California San Diego, La Jolla, CA, USA. <sup>5</sup>Department of Human Genetics, UCLA, Los Angeles, CA, USA.

\*These authors contributed equally to this work. <sup>†</sup>[mdesai@oeb.harvard.edu](mailto:mdesai@oeb.harvard.edu)

## Abstract

Evolution can favor organisms that are more adaptable, provided that genetic variation in adaptability exists. Here, we quantify this variation among 230 offspring of a cross between diverged yeast strains. We measure the adaptability of each offspring genotype, defined as its average rate of adaptation in a specific environmental condition, and analyze the heritability, predictability, and genetic basis of this trait. We find that initial genotype strongly affects adaptability and can alter the genetic basis of future evolution. Initial genotype also affects the pleiotropic consequences of adaptation for fitness in a different environment. This genetic variation in adaptability and pleiotropy is largely determined by initial fitness, according to a rule of declining adaptability with increasing initial fitness, but several individual QTLs also have a significant idiosyncratic role. Our results demonstrate that both adaptability and pleiotropy are complex traits, with extensive heritable differences arising from naturally occurring variation.

# Introduction

All organisms can evolve in the face of environmental perturbations. Yet even closely-related individuals may differ in how quickly and effectively they adapt (Kirschner and Gerhart, 1998; Masel and Trotter, 2010; Luring et al., 2013). Genetic modifiers that create these differences in evolvability are subject to natural selection, and the potential consequences of secondary selection on evolvability has been the subject of extensive theoretical work (Van Nimwegen et al., 1999; Wilke et al., 2001; Masel and Bergman, 2003; Ciliberti et al., 2007; Cowperthwaite et al., 2008; Draghi et al., 2010; Soyer and Pfeiffer, 2010). Only recently, however, have experiments begun to identify these genetic modifiers and characterize their effects (Montville et al., 2005; Jarosz and Lindquist, 2010; Woods et al., 2011; McDonald et al., 2012; Stern et al., 2014; McDonald et al., 2016; Xiao et al., 2016).

Modifiers of evolvability act by changing parameters of the evolutionary process. For example, mutator or antimutator alleles often spread through adapting laboratory populations (Sniegowski et al., 1997; McDonald et al., 2012; Wielgoss et al., 2013). Other empirical work has shown that alleles that modify recombination rates can speed the rate of adaptation or help purge deleterious load (Zeyl and Bell, 1997; Colegrave, 2002; Goddard et al., 2005; Cooper, 2007; Becks and Agrawal, 2012; Gray and Goddard, 2012; McDonald et al., 2016; Xiao et al., 2016). Mutations can also affect evolvability in more subtle ways, through epistatic interactions that shape the future directions that evolution can take. These epistatic effects create historical contingency: the presence of an initial mutation changes the fitness effects of other potential mutations, opening up or closing off future adaptive trajectories (Blount et al., 2008; Woods et al., 2011; Salverda et al., 2011; Blount et al., 2012).

The identification and characterization of epistasis among specific sets of mutations has been a subject of intensive recent research. For example, several groups have analyzed combinations of mutations within the same protein that fixed during evolution (Weinreich et al., 2006; Bridgham et al., 2009; Gong et al., 2013), or combinations of multiple mutations in a region of a protein (Hietpas et al., 2011; Araya et al., 2012; Jacquier et al., 2013; Harms and Thornton, 2014). These studies often find interesting intra-protein patterns of epistasis, including sign epistasis (i.e. mutations shifting from beneficial to deleterious based on the genotype in which they are placed). Other studies have measured pairwise epistasis among large collections of genome-wide mutations (e.g. all single gene knockouts) (Jasnos and Korona, 2007; van Opijnen et al., 2009; Costanzo et al., 2010; Szappanos et al., 2011; Babu et al., 2014; Costanzo et al., 2016). Still others have analyzed epistasis among all combinations of a few mutations that accumulated along the line of descent in a microbial evolution experiment (Chou et al., 2011; Khan et al., 2011; Wütsche et al., 2017), measured the fitness effects of individual mutations in divergent genetic backgrounds (Wang et al., 2016), or identified examples where a single mutation opens up an opportunity to colonize a new metabolic niche (Blount et al., 2008, 2012; Quandt et al., 2014, 2015).

This body of work has extensively analyzed genetic interactions between individual mutations, a phenomenon we call *microscopic epistasis* (Good and Desai, 2014). These interactions can

lead to historical contingency in the order and identities of mutations that spread in an adapting population (Weinreich et al., 2005). However, to affect evolvability a mutation must change the entire distribution of fitness effects of future mutations. That is, it must lead to a region of the fitness landscape which has statistically different properties, a phenomenon we refer to as *macroscopic epistasis*.

Although it is clear that microscopic epistasis is widespread, much less is known about patterns of macroscopic epistasis. Thus it is unclear how often and which mutations lead to differences in evolvability. Several recent studies have addressed this question by analyzing variation in the rate of adaptation among closely related microbial strains (Couce and Tenaillon, 2015). These studies have found that a few initial mutations can affect how quickly a strain adapts in the future (Barrick et al., 2010; Perfeito et al., 2014; Kryazhimskiy et al., 2014; Szamecz et al., 2014). Much of this variation in adaptability can be explained by the fitness of the founder, with fitter founders adapting more slowly (i.e. the rule of declining adaptability).

This work suggests that the rate at which a strain adapts is a heritable trait, influenced not just by stochastic evolutionary factors, such as the random occurrence and fixation of mutations, but also by genotype. However, little is known about variation in evolvability across larger genetic distances. In other words, how different is the evolutionary process starting from very different points in genotype space? Does a systematic pattern of declining adaptability with increasing fitness still apply among more distantly related strains? Or are differences in evolvability caused primarily by specific interactions between any of the initial genetic differences and the pool of potential future mutations? Additionally, previous studies have analyzed evolution in a single environmental condition, and thus could not test how initial genotype might affect the pleiotropic consequences of evolution (i.e. how adaptation in one environment affects fitness in other conditions). Note that here we use the term “pleiotropy” in a sense that is common in experimental evolution but not in the genetics literature: it reflects how mutations that effect one trait (fitness in one environment) also influence other traits (fitness in different environments).

In this study, we address these gaps by measuring genetic variation in adaptability among 230 haploid *S. cerevisiae* genotypes (“founders”) derived from a cross between two substantially diverged parental strains (Bloom et al., 2013). The parental strains (a laboratory strain, BY, and a wine strain, RM) differ at  $\sim 50,000$  loci. Thus our 230 founders differ by on average  $\sim 25,000$  mutations that are to some degree representative of natural variation in yeast. We evolve four replicate lines descended from each founder for 500 generations in each of two different laboratory environments. As in earlier studies, we can then measure variation in evolutionary outcomes that can be attributed to founder identity, above and beyond inherent evolutionary stochasticity. However, because our founders are chosen from a panel of strains designed for mapping the genetic basis of phenotypes of interest — each founder contains a random subset of the genetic variation between RM and BY strains — we can also use standard methods from quantitative genetics to identify specific loci that affect adaptation.

We focus on quantifying two specific aspects of evolvability: the rate of adaptation of each

founder in each environment, and the pleiotropic consequences of adaptation in one environment for fitness in the other. We also address the influence of founder genotype on the genetic basis of future adaptation. Our results demonstrate that variation in both adaptability and pleiotropy is widespread. Despite the fact that our founder genotypes span evolutionary distances that are several orders of magnitude larger than tested in earlier work, the variation in their rates of adaptation still follows an overall rule of declining adaptability. The variation in pleiotropic consequences of adaptation between founders is also partly governed by founder fitness. Above and beyond these effects of founder fitness, we also identified several specific quantitative trait loci (QTLs) that affect adaptability and pleiotropy, including one which has a large influence on the genetic basis of future evolution. Thus both macroscopic and microscopic epistasis are important in our system, and lead to systematic variation in the rate, genetic basis, and pleiotropic consequences of adaptation.

## Results

To measure genetic variation in adaptability in budding yeast, we selected 230 segregants (“founders”) from a cross between a wine strain, RM, and a laboratory strain, BY (Methods). The parental strains RM and BY differ by about 0.5% at the sequence level, so each founder differs from its siblings at about 25,000 loci across the genome. We chose to analyze evolvability in two environments: rich media at an optimal temperature of 30 °C (the OT environment), and synthetic media at a high temperature of 37 °C (the HT environment). We measured the initial fitness of each founder in each environment and found that the genetic differences between founders leads to substantial variation in starting fitness in both environments (Figure 1). This variation is strongly correlated, implying that at least on average, alleles that are more beneficial in our OT environment also tend to be more beneficial in our HT environment.

We established eight replicate lines from each founder (a total of 1840 populations), and evolved half of these replicate populations in our OT environment and half in our HT environment. After 500 generations of evolution, we measured the fitness of each descendant population in both environments (Figure 1). The difference between the initial fitness of the founder,  $X$ , and the fitness of a descendant population,  $X'$ , is a measure of the rate at which that population adapted.

The measured rate of adaptation includes contributions from experimental error (inaccuracies in our fitness measurements lead to apparent differences in the rate of adaptation), from evolutionary stochasticity (some populations are more lucky than others in accumulating beneficial mutations), and from the inherent adaptability of the founder (some founders may tend to adapt faster than others). We are primarily interested in understanding the third component: the effect of founder genotype on adaptability. To disentangle this from evolutionary stochasticity, we can compare the variation in the rate of adaptation between lines descended from the same founder with the variation between lines descended from different founders. Similarly, to disentangle the effects of measurement error, we can compare the variation between lines descended from the same founder with the variation between replicate fitness measurements of the same populations. We could

in principle compare these different sources of variation using an analysis of variance (ANOVA) framework, following the approach we used in previous work (Kryazhimskiy et al., 2014). Here, we instead describe this analysis in the language of quantitative genetics. While some of the underlying methods are equivalent, this quantitative genetics framework provides a useful perspective, and makes it possible to address additional questions about the genetic basis of variation in adaptability.

We begin by calculating the broad and narrow sense heritability of founder fitness and adaptability. Here the broad-sense heritability of a phenotype,  $H^2$ , is the fraction of the variance in that phenotype that can be explained by genotype. The narrow-sense heritability,  $h^2$ , is the fraction of the total variance in the phenotype which can be explained by an additive model of the individual loci. We calculate both broad and narrow-sense heritability using standard methods (Yang et al., 2010; Zuk et al., 2012; Visscher et al., 2006), which exploit the fact that in an additive model the covariance between founder phenotypes is a linear function of their relatedness (Methods). Since our populations are all haploid, the gap between broad-sense and narrow-sense heritability arises primarily from epistatic interactions between loci and any experimental error in our estimation of these quantities, although it may also carry contributions from untagged rare variants, mitochondrial copy number variation, and any uncontrolled GxE effects (Bloom et al., 2015).

We first consider the heritability of the founder fitness. We find that this has a broad-sense heritability near 100% (Figure 2, Table 1), indicating that measurement errors are small compared to genuine differences in fitness between founders. Consistent with previous work (Bloom et al., 2013), we find a substantial gap between  $h^2$  and  $H^2$  (Figure 2, Table 1), indicating the importance of epistasis in determining founder fitness.

We next consider the heritability of adaptability. The broad-sense heritability of adaptability,  $H_{\Delta X}^2$ , is the fraction of variance in  $\Delta X = X' - X$  that can be attributed to founder genotype, rather than to inherent evolutionary stochasticity or to measurement errors. In contrast to founder fitness, which we expect to be a property of the genotype, there is no reason that the rate of adaptation must be heritable. However, multiple previous studies have found that genotype does affect the rate of adaptation in microbial populations (Burch and Chao, 2000; Barrick et al., 2010; Woods et al., 2011; Perfeito et al., 2014; Kryazhimskiy et al., 2014). Consistent with this earlier work, we find that adaptability is heritable, with  $H_{\Delta X}^2 \approx 0.61$  in the OT environment and 0.65 in the HT environment (Figure 2, Table 1). The fact that the values of  $H_{\Delta X}^2$  are lower than those of  $H_X^2$  is expected because, in addition to measurement errors, our measure of adaptability is affected by the inherent randomness of the evolutionary process.

As before, we fit a linear model to estimate the narrow-sense heritability of adaptability  $h_{\Delta X}^2$ . We find  $h_{\Delta X}^2 = 0.46$  in the OT environment and  $h_{\Delta X}^2 = 0.44$  at HT (Figure 2, Table 1). The difference between  $H_{\Delta X}^2$  and  $h_{\Delta X}^2$  indicates that about two thirds of the heritable variation in adaptability can be explained by an additive model of the underlying genotype, showing that epistasis is important to this trait (Figure 2).

# Predicting adaptability from genotype and founder fitness

We next sought to map the genetic basis of the observed variation in founder fitness and adaptability. To do so, we applied a standard iterative procedure to identify QTLs that affect each of these traits in each environment (see Methods). We identified 6 QTLs that affect founder fitness at OT, and 3 QTLs that affect founder fitness at HT. Consistent with the strong correlation between these two phenotypes, 2/3 of the HT QTLs also appear as OT QTLs (Table 2). In both cases, these QTLs explain 76% of the trait variance. This is consistent with the estimated values of narrow-sense heritability (Figure 2, Table 1), indicating that these QTLs explain most of the genetic variation in founder fitness that can be captured by an additive model of the underlying genotype (Table 2). We also found 4 QTLs that significantly affect adaptability,  $\Delta X$ , at OT and 2 QTLs that affect adaptability at HT. Note that these 2 loci are a subset of the OT adaptability loci (Table 2). Together these adaptability QTLs explain 30% of the total variance in this trait in the OT environment, and 31% in the HT environment, also consistent with our estimates of narrow-sense heritability (Figure 2 and Figure 3 and Table 1).

Interestingly, three of the four adaptability loci were also independently identified as QTLs for founder fitness (Table 2), suggesting that loci that affect founder fitness also affect adaptability. This is consistent with the conclusions of several recent studies, which show that much of the variation in adaptability between closely related microbial strains can be explained by differences in their initial fitness, according to the rule of declining adaptability (Perfeito et al., 2014; Kryazhimskiy et al., 2014; Couce and Tenaillon, 2015). Motivated by these results, we asked whether a similar effect holds in our system as well, even though our founders are several orders of magnitude more diverged than strains analyzed in earlier studies. We found that indeed founder fitness explains much of the variation in adaptability, and follows the rule of declining adaptability (Figure 3). Specifically, a model where adaptability declines linearly with founder fitness explains 42% of the total variance in adaptability in the OT environment, and 52% of the adaptability at HT, or about 68% and 80% of the heritable variance, respectively (Figure 2). This represents more of the variance explained than the linear QTL models described above, despite the fact that the QTL models have more free parameters. Interestingly, the variance explained by founder fitness is comparable to the narrow-sense heritability, suggesting that founder fitness may be as good of a predictor of adaptability as any linear genetic model.

Since founder fitness explains more variation in adaptability than additive QTL models, and since three of the identified QTLs affect both fitness and adaptability, it is natural to ask whether there are any genetic loci that explain some of the variation in adaptability above and beyond that explained by fitness. Indeed, about 30% and 20% of heritable variation in adaptability remain unexplained by founder fitness in the OT and in the HT environment, respectively (Figure 2, Table 1). Can we then identify QTLs that explain any of this residual variation?

To address this question, we first asked whether any of the previously identified QTLs (either for founder fitness or for adaptability) can help explain variation in adaptability once we have taken fitness into account. We found that several of these QTLs had a modest effect on adaptability



above and beyond fitness (Table 2). The QTL with the largest effect was centered at position 376,315 on chromosome XIV, and we refer to it as the “*KRE33* locus.” This QTL explains 2% percent of residual residual variation in adaptability in the HT environment, and 0.4% percent in the OT environment (Figure 3). We previously identified this locus as having the largest effect on founder fitness: segregants with the BY allele at this locus are on average 9% more fit at OT and 19% more fit at HT compared to segregants with the RM allele. After adding pairwise interaction terms between the *KRE33* locus and other detected QTLs, the combined model explains 82% of the heritable variation in adaptability in the HT environment and 88% in the OT environment (Table 1). Thus most of the heritable variation in adaptability in our system can be explained by founder fitness, with some additional contributions from genotype at a few adaptability QTL loci. Nonetheless, there remains some residual variation due to further unidentified genotype effects.

To check for strong effect adaptability QTLs not previously identified, we repeated the QTL discovery procedure described above, taking the trait to be the residual variation in adaptability about the regression line in Figure 3. We recovered a subset of the already-identified adaptability QTLs, without identifying any further loci.

## The genetic basis of adaptation

Our observations of heritable variation in adaptability indicate that macroscopic epistasis is widespread in our system, and can be largely explained by a model involving founder fitness and a small number of QTLs. However, it is not clear whether this is accompanied by microscopic epistasis between alleles in the founders and potential future mutations. In other words, do different founders accumulate different sets of beneficial mutations as they adapt? And if so, can we identify QTLs or other factors (e.g. founder fitness) that modify the spectrum of mutations that accumulate during adaptation?

To address this question, we sequenced 273 whole-population samples from the final timepoint of all independently evolved populations descended from each of 35 founders (Supplementary File 3). We discarded nineteen populations for technical reasons before calling mutations (see Methods), leaving us with a total of 254 sequenced lines (mean 23x depth). We identified SNPs and small indels in this mixed-population sequence data (Methods). We focus here only on mutations that were fixed or estimated to be at high frequency (above 50%) within the population at this final timepoint. We identified a total of 603 mutations (on average 1.3 per OT population and 3.6 per HT population) meeting these criteria. Of these, 449 are nonsynonymous mutations or indels in genes (293 from HT populations, 156 from OT populations).

More fit founders can adapt more slowly because they have access to fewer beneficial mutations, or to beneficial mutations of weaker effect, or both. In any of these cases, we expect that mutations accumulate more slowly over time in populations descended from fitter founders. Consistent with this expectation, we found that the number of mutations identified in a population declines weakly but significantly with the initial founder fitness (Figure 4).

Beyond variation in the number of mutations, did founder genotype affect the spectrum of

mutations available to future adaptation? To address this question we focused on genes that were mutated in multiple populations (genes mutated in a single population are uninformative for this purpose). We found 27 genes in which missense or putative loss of function mutations were called in two or more independent populations (Figure 5); these “multi-hit” genes are expected to be enriched for targets of selection.

The gene with the second-largest number of identified *de novo* mutations was *KRE33*: 31 independent sequenced populations acquired a mutation in this gene (a total of 12% of our 254 sequenced lines; Figure 5). All 31 of these populations are descended from founders that had the less-fit RM allele at the QTL containing the *KRE33* gene (i.e. the same QTL that we identified above as affecting adaptability; Figure 5). This observation suggests that genetic variation in the *KRE33* gene itself might have caused the observed variation in adaptability. Since the Kre33 protein is a member of the 90s preribosomal pathway, we reasoned that the deleterious effect of the RM allele could potentially be compensated not only by mutations in *KRE33* itself, but also by mutations in genes that code for other members of the ribosome biogenesis pathway. Consistent with this hypothesis, we found 108 putatively functional mutations in our sequenced lines in 10 genes (including *KRE33*) that were categorized as belonging to this pathway, all of which arose in descendants of founders that carry the RM allele at the *KRE33* locus (Figure 5). Thus, compensation for the deleterious effect of the RM allele in the *KRE33* gene is likely one of the strongest targets of selection in our experiment, and it likely contributes to the increased adaptability of the founders which carry the RM version of *KRE33*.

Of the remaining 101 mutations in multi-hit genes, 14 out of 15 mutations in *GPB1*, *GPB2* and *PDE2* — genes involved in cAMP regulation — occurred exclusively in populations descended from founders that carry the more-fit BY allele at the *KRE33* locus. This suggests a potential genetic interaction between *KRE33* and this pathway, such that mutations in *GPB1*, *GPB2*, and *PDE2* are more beneficial in the BY *KRE33* background. However, it is also possible that these mutations are always beneficial, but are less likely to fix in the *KRE33*-RM background where they can be lost to clonal interference with more strongly beneficial mutations (e.g. those in the ribosome biogenesis pathway).

The effect of the *KRE33* allele on the genetic basis of future adaptation suggests that other loci that contribute to fitness or adaptability differences between RM and BY strains might also be targets for adaptive *de novo* mutations. To test this hypothesis, we asked whether multi-hit genes are preferentially found within the 8 QTLs that we identified as influencing founder fitness or adaptability. We found two additional examples of multi-hit genes that lie within the confidence interval for one of these 8 QTLs: *IRA2* and *BFR2* (Table 2). These 2 genes, along with *KRE33*, represent an enrichment over the expected number of genes in common between the set of multi-hit genes and those within QTL confidence intervals (Methods). Additionally, *RAS2*, an essential gene which acts as a master regulator in the cAMP pathway that includes 5 multi-hit genes (including *IRA2* Figure 5), is found within one of the QTLs affecting fitness. These results suggest that some loci that underlie variation in fitness among founders are also targets of selection during subsequent



evolution. They also suggest that the cAMP pathway, which has been implicated as a target of adaptive *de novo* mutations in several other experimental evolution studies (Venkataram et al., 2016; Kvitek and Sherlock, 2013; Lang et al., 2013), may also explain some of the fitness differences caused by natural genetic variation.

With the exception of the cases noted above, which all involve QTLs previously identified as affecting fitness or adaptability, we lack power to identify individual loci in the founder genotype that affect the genetic basis of future adaptation. That is, we cannot find specific QTLs that affect whether mutations in any of the 27 multi-hit genes will be observed in the descendants of a given founder. However, we can still ask whether the mutations that occur during adaptation show a nonrandom association with the founder genotype. We can also ask whether the mutations that occur during adaptation depend on the environment in which evolution was conducted. To do so, we calculated the mutual information  $I(G, E; M)$  provided by the founder genotype  $G$  and evolution environment  $E$  about the set of mutations  $M$  that accumulate during adaptation (see Methods for details; note in particular that we control for the identity of the *KRE33* allele throughout this analysis). Intuitively, the mutual information  $I(G, E; M)$  measures the amount of information (in bits) that we gain about  $M$  by knowing  $G$  and  $E$ . Higher values of  $I$  indicate that  $G$  and  $E$  more strongly predict  $M$ .

We used  $I(G, E; M)$  as a test statistic to determine whether there were nonrandom associations between founder genotype, evolution environment, and the mutations that underlie adaptation. Controlling for the number of mutations acquired by each population, we detected a significant association between the evolution condition and the mutations that accumulate during adaptation. For example, we found putatively functional mutations in *SIR3* and *SIR4* in 34 different populations, 30 of which evolved at HT. However, the overall magnitude of this effect of  $E$  on  $M$  is small, on the order of 0.1 bits. In addition to this effect of environment, we also find that the genotype  $G$  affects  $M$ . Specifically, controlling for the number of mutations, the *KRE33* allele, and the evolution environment, there is a small additional effect of founder on the identities of *de novo* mutations. This suggests that while founders with the same allele at the *KRE33* locus draw many common adaptive mutations from the same pool, there are additional founder-specific epistatic interactions.

## The pleiotropic consequences of adaptation

Adaptation to one environment can lead to concomitant fitness gains or losses in other environments, an effect we refer to as pleiotropy for fitness. To characterize these pleiotropic effects in our system, we analyzed how evolution in our OT environment affects fitness in the HT environment, and vice versa. We can describe the founder fitnesses in both environments as  $\vec{W} = (X, Y)$ , where  $X$  is the initial fitness at OT and  $Y$  is the initial fitness at HT. As noted above, the founder fitnesses in the two environments were strongly correlated, especially within each of the two *KRE33* allele groups (Figure 6A), suggesting that the alleles that distinguish RM and BY have correlated effects in our environments.

We next calculated the fitness gains for populations adapted to each environment. After

evolution in a given environment, a founder with fitness  $\vec{W} = (X, Y)$  will have adapted, yielding a descendant line with fitness  $\vec{W}' = (X', Y')$ . We denote the fitness increments of this population as  $\Delta\vec{W} \equiv (\Delta X, \Delta Y) = (X' - X, Y' - Y)$ ; this vector represents the increase or decrease in fitness of the descendant population in both environments, after evolution in one of the two environments. For clarity, we will use the notation  $\Delta_{OT}$  to refer to the fitness increments of descendant populations after evolution in the OT environment, and  $\Delta_{HT}$  to refer to the fitness increments after evolution in the HT environment. We refer to the environment in which a given population evolves as its “home” environment, and the other environment as its “away” environment. Thus  $\Delta_{OT}X$  and  $\Delta_{HT}Y$  are fitness increments in the home environments, and  $\Delta_{OT}Y$  and  $\Delta_{HT}X$  are fitness increments in the away environments.

We find that, on average, populations adapting to either of our two environments also gained fitness in the other environment (Table 3), consistent with our observation that the sets of multi-hit genes in the two environments were highly overlapping. Thus as populations adapt, their fitnesses at OT and HT remain positively correlated (Figure 6B, C). Despite this overall pattern of correlated adaptation, we find that the average fitness gain at HT was significantly higher after evolution at HT than after evolution at OT (Table 3), as we might expect. However, the converse was not true: populations increase in fitness at OT by about the same amount after evolving at HT as they do after evolving at OT. Because populations evolved at HT and those evolved at OT made almost identical fitness gains at OT, but different gains at HT, evolution in these two conditions must involve different sets of adaptive mutations, despite the overlap in the targets of selection between the two environments. This is consistent with our mutual information analysis above.

## The genetic basis of pleiotropy

We next used the framework of quantitative genetics to analyze the effects of founder genotype on pleiotropy. We find that the pleiotropic consequences of adaptation to our HT environment are highly heritable, with broad-sense heritability  $H^2$  of the fitness increases in the away environment,  $\Delta_{HT}X \approx 0.62$ . This is similar to the heritability of adaptability we found above. In contrast, the pleiotropic consequences of adaptation to our OT environment are much less heritable, with broad-sense heritability of  $\Delta_{OT}Y \approx 0.29$ , indicating that in this case stochastic evolutionary forces are more important to the outcome than genotype.

As with the adaptability traits analyzed above, we find that the narrow-sense heritability of pleiotropy is substantially lower than the broad-sense heritability (Figure 7). Specifically, we find  $h^2 \approx 0.48$  for  $\Delta_{HT}X$  and  $h^2 \approx 0.09$  for  $\Delta_{OT}Y$ . Thus most of the heritable variation in this trait cannot be explained using an additive QTL model of the underlying founder genotype.

We next sought to understand which factors best explain the heritable variation in pleiotropy. Analogous to our analysis of adaptability, we consider the potential effects of specific QTL loci as well as of founder fitness (now in both home and away environments). We begin by fitting a model in which the fitness increments in the away environment decline linearly with the founder fitness in both the home and the away environments. We find that founder fitness does explain

much of the heritable variation in pleiotropy (68% of the heritable variation in  $\Delta_{HT}X$  and 43% for  $\Delta_{OT}Y$ ). However, we find that it is only the initial fitness in the *away* environment that is important: once founder fitness in the away environment is included in the model, founder fitness in the home environment adds no further explanatory power, while the converse is not true.

To assess the dependence of pleiotropic outcomes on specific parental alleles, we next looked for QTLs that influence fitness increments in the away environment, over and above founder fitness in that environment. Specifically, we asked whether any of the eight previously-identified QTLs could help predict pleiotropic outcomes over and above founder fitness in the away condition. We find that 6 of these loci, including *KRE33*, do have a significant effect on pleiotropic outcomes (Table 2). Together with founder fitness in the away condition, they explain 75% and 58% of the heritable variation in pleiotropy at OT and HT, respectively (Figure 7). To check for strong effect pleiotropy QTLs not previously identified, we also repeated the QTL discovery procedure described above, taking the trait to be the residual variation in fitness increments in the away environment after regression against founder fitness in that environment. We recovered a subset of the previously identified QTLs, without identifying any further loci.

## Discussion

In order for evolution to increase or decrease adaptability, there must be genetic variation in this trait that natural selection can act on. Here, we analyzed the extent and genetic basis of variation in adaptability among 230 segregants from a cross between two divergent yeast strains (Bloom et al., 2013). By exploiting the structure of the cross, we mapped QTLs that explain observed differences in adaptability. We then compared the predictive power of these additive genetic models with an alternative model where adaptability depends on founder fitness.

Consistent with earlier work, we find that the rate of adaptation is a heritable trait: different founders consistently adapt at different rates. This means that some of the  $\sim 50,000$  alleles that distinguish BY from RM alter future adaptive trajectories. In principle, these effects could involve just a few founder alleles whose effects on adaptability are independent of each other (e.g., if particular alleles that distinguish RM and BY create opportunities for improvement of independent biological processes). If this were the case, an additive model involving these variants would explain the observed heritable variation in adaptability between founders. However, we find that the best additive QTL model explains at most about half of the observed heritable genetic variation in adaptability.

Instead, we find that a model based on founder fitness explains more of the heritable variation in adaptability, despite having fewer free parameters. This is broadly consistent with earlier work showing that initial fitness explains variation in adaptability among founders that differ only by a few mutations (Barrick et al., 2010; Perfeito et al., 2014; Kryazhimskiy et al., 2014; Wang et al., 2016). However, over the larger genetic distances we study here, a substantial fraction of heritable variation in adaptability is not explained by founder fitness. About half of the remaining variation

can be explained by including *KRE33* and a small number of other loci as predictors in addition to founder fitness, leaving about 20 percent of the heritable variation unexplained.

We next investigated the pleiotropic consequences of adaptation in one (“home”) environment on fitness in another (“away”) environment. We found that in the two conditions we considered, adaptation to the home environment leads on average to a fitness gain in the away environment. As with adaptability, these fitness increments in the away environment were heritable. To some extent this is expected: since founder genotype affects adaptability, we expect the founder genotype to affect pleiotropy as well, simply because fitness gains in the home environment are correlated with fitness gains in the away environment. Consistent with this, we find that founder fitness does explain much of the heritable variation in pleiotropy. Surprisingly, however, only initial fitness in the *away* environment is important. These results are consistent with a simple model in which the fitness effects of mutations in any environment are modulated by the fitness of the genetic background in that environment, regardless of how these mutations were acquired. Thus the effects in environment B of mutations accumulated through evolution in environment A are determined primarily by the fitness of the genetic background in environment B.

We also found that the broad-sense heritability of fitness changes in the away environment is asymmetric. For populations evolved at HT, fitness gains in the OT environment were highly heritable, and predicted well by founder fitness in the OT (away) environment. This suggests that the HT populations acquired a set of mutations whose effects at OT are predictable based on the fitness of the genetic background in this condition. Conversely, the populations evolved at OT saw much more variable gains at HT. This implies that the mutations accumulated at OT have effects at HT that are less predictable from founder fitness or genotype.

In addition to founder fitness, we find that the *KRE33* allele and a few other smaller-effect QTLs significantly affect evolutionary outcomes. To some extent, these QTLs affect evolution through their impact on founder fitness. However, five QTLs, including *KRE33*, affect adaptability and in some cases pleiotropy above and beyond their effects on founder fitness. The founder allele at the *KRE33* locus also strongly affects the spectrum of mutations that accumulate during adaptation: founders that start with the less-fit RM allele at *KRE33* accumulate mutations in *KRE33* and in other genes involved in the 90s preribosomal pathway. These genes are all essential, so these mutations likely involve gain or attenuation rather than loss of function. Surprisingly, despite this effect, *KRE33* still has only a modest impact on adaptability and pleiotropy above and beyond the founder fitness. For example, populations descended from founders with the BY and RM alleles of *KRE33* had similar patterns of fitness gains in the two environments, despite acquiring different sets of mutations (Figure 6D). This suggests that the pleiotropic effects of these two classes of mutations are similar.

Together, these observations suggest the following simple phenomenological picture of adaptation in this system. The average fitness of an adapting yeast population in its home environment is statistically predictable based on the fitness of its founding genotype, as well as the allele at the *KRE33* locus and a few other loci, even for highly divergent strains. Mutations accumulated during

adaptation tend to lead to pleiotropic fitness gains in other, related, environments. Our ability to predict these pleiotropic fitness gains depends on the environment: it is strong in one case but weak in the other. This points to the possibility that fitness trade-offs between environments, and other complicating factors, disrupt our ability to predict pleiotropic fitness gains.

We note that our experimental approach has several limitations. Most importantly, we define adaptability as the expected increase in fitness of a line descended from a given founder after 500 generations of evolution in one of two specific laboratory environments. The effects of founder fitness and genotype on adaptability and pleiotropy might change over different timescales or in a different set of environmental conditions. In particular, the heritability of pleiotropic effects of adaptation may be a consequence of the similarity of the environments we chose, and might be lower across less similar conditions. Our results may also depend on our choice of this specific yeast cross as our source of founder genotypes. Nevertheless, our work provides the first systematic analysis of genetic variation in adaptability and pleiotropy.

Our results are consistent with earlier studies showing that microscopic epistasis is common among mutations that accumulate along the line of descent in laboratory microbial evolution experiments. However, it has been unclear whether this microscopic epistasis leads to macroscopic epistasis, in which related genotypes have different distributions of fitness effects of new mutations. In principle, many patterns of microscopic epistasis could be consistent with the same pattern of macroscopic epistasis, or with no macroscopic epistasis at all. In turn, many types of macroscopic epistasis could be consistent with the same pattern of variation in adaptability, since the expected rate of adaptation depends in a complex way on the entire distribution of fitness effects of new mutations and on population parameters. For example, it is possible to have extensive macroscopic epistasis without any variation in adaptability.

One way to study differences in adaptability would be to take a bottom-up approach, measuring patterns of microscopic epistasis and using these to characterize macroscopic epistasis and then adaptability. We have instead taken the opposite approach, by directly measuring genetic variation in adaptability. We show that even across large genetic distances, less-fit initial genotypes adapt more rapidly than more-fit initial genotypes. However, we also find at least one significant microscopic epistatic interaction that affects adaptability at both fitness and genotype levels in our HT environment, involving the allele at the *KRE33* locus. This microscopic epistasis also exists in our OT environment, as evidenced by its effect on the genetic basis of adaptation, and on the pleiotropic consequences in the HT condition. Surprisingly, however, this microscopic epistasis has a very weak effect on the rate of adaptation in the OT environment, above the effect we expect from lower founder fitness. This is an example of a case where idiosyncratic microscopic epistasis does not lead to differences in adaptability, either because the microscopic epistasis does not lead to macroscopic epistasis, or because it leads to macroscopic epistasis which does not significantly affect adaptability.

# Methods

## Founders of evolving populations

We selected the founders of our evolving populations from a panel of haploid segregants constructed by Bloom *et al.* (Bloom *et al.*, 2013). Briefly, Bloom *et al.* mated strains derived from RM11-1a and BY4716, sporulated the resulting diploids, and then isolated and sequenced 1000 haploid offspring (Bloom *et al.*, 2013). We used the first 230 MATa segregants from this cross as our founder strains (Supplementary File 1).

## Experimental evolution

We established eight populations from each founder. To avoid artifacts arising from shared standing variation, we founded each population from an independent colony. We propagated each of the resulting 1840 lines for 500 generations in batch culture in unshaken flat bottom polypropylene 96-well plates. We maintained half of the lines (four descended from each founder) in 128  $\mu$ L of rich laboratory media, YPD (1% Bacto yeast extract (VWR #90000-722), 2% Bacto peptone (VWR #90000-368), 2% dextrose (VWR #90000-904)) at 30°C with daily 1 : 2<sup>10</sup> dilutions (the OT environment). We maintained the other half of the lines in 128  $\mu$ L of synthetic complete media (0.67 % YNB with nitrogen (Sunrise Science #1501-250), 0.2% SC (Sunrise Science # 1300-030), 2% dextrose) at 37°C with daily 1 : 2<sup>9</sup> dilutions (the HT environment). All liquid handling was conducted using a BiomekFX robot (Beckman Coulter). Prior to dilution, cultures were resuspended by shaking at 1200 rpm for 2 minutes on a Titramax 100 plate shaker.

As previously described by Lang *et al.* (2011), this protocol results in approximately ten generations per day (for the OT environment) or nine generations per day (for the HT environment) at an effective population size of  $N_e \approx 10^5$ . Every 7 days, aliquots from each population were mixed with glycerol to 25% and kept at -80°C for long-term storage. To check for cross-contamination, each plate contained a unique pattern of blank wells. No cross contamination events were observed during the evolution. However, some wells were lost due to pipetting artifacts. These wells were excluded from all analysis, leaving a total of 910 evolved lines in the OT environment and 839 in the HT environment.

## Fitness assays

We conducted fitness assays as described previously (Kryazhimskiy *et al.*, 2014). Briefly, we measured fitness by competing founding clones and evolved populations against a common reference strain. To construct the reference, we selected a segregant with intermediate fitness from the initial RMxBY cross (segregant LK3-B08; see Supplementary File 1 for the genotype). We integrated an mCitrine-KanMX cassette at the *ho* locus of this segregant. The marker was obtained via a digest of plasmid pEJ03-mCitrine-KanMX-HO (Supplementary File 4) with pMEI and transformed using standard yeast genetic techniques (Adams *et al.*, 1998). Transformants were selected based on



growth on G418, and the Citrine+ phenotype was confirmed via flow cytometry.

For each fitness assay, we first allowed both the evolved and reference strains to acclimatize in the relevant environment for 24h. We then mixed these strains in approximately equal proportions and propagated them for two days using the same protocol as for evolution. We used Fortessa and LSRII flow cytometers (BD Biosciences) to count the ratio of evolved and reference strains 1 and 2 days (approximately 10 generations and 20 generations respectively, or 9 and 18 in the HT environment), counting approximately 30,000 cells in each measurement. We estimated the fitness of the evolved strain relative to the reference as  $s = \frac{1}{\tau} \ln\left(\frac{n_{e,f}}{n_{r,f}} \frac{n_{r,i}}{n_{e,i}}\right)$ , where  $\tau$  is the time between measurements in generations,  $n_{e,i}, n_{e,f}$  are the initial and final counts of the evolved strain, and  $n_{r,i}, n_{r,f}$  are the initial and final counts for the reference. In the HT environment (synthetic medium), we found that in a sample of pure reference cells, 98.5% were fluorescent. To account for this, we adjusted the fitness estimates for this environment slightly:  $s = \frac{1}{\tau} \ln\left(\frac{n_{e,f} - pn_{r,f}}{n_{r,f}} \frac{n_{r,i}}{n_{e,i} - pn_{r,i}}\right)$ , where  $p = 0.015$  is the non-fluorescent proportion of reference cells. To estimate the error on the founder fitnesses, we measured the fitnesses of the eight founder clones picked from each segregant in their home environment (i.e. four at OT and four at HT). We measured the fitnesses of each final evolved population at both OT and HT. To obtain estimates of the technical error for these measurements, we chose 24 final populations at random and made 8 technical replicate measurements of each in each of the two measurement conditions.

## Sequencing and mutation calling

We sequenced all 273 populations descended from 35 founders in both environments (this excludes 7 populations descended from these founders that were lost due to pipetting artifacts during evolution, as described above). The founders selected for this sequencing were chosen to ensure approximately equal representation of each parental *KRE33* allele (see below), but were otherwise random. To focus on common mutations within each population, we sequenced mixed whole-population samples. We prepared libraries for sequencing as described previously (Baym et al., 2015), and performed whole-genome sequencing on an Illumina HiSeq 2500 in rapid run mode.

To process the whole-population sequence data, we first trimmed reads using Trimmomatic function ‘Illuminacclip’, with options Leading:20, Trailing:20 (Bolger et al., 2014). We merged overlapping paired-end reads using the bbmerge function of bbtools (v36.77). We then used Breseq v0.27.1 (Deatherage and Barrick, 2014) with option ‘-p’ (polymorphic mode) to align reads to the S288c public reference genome (version R64-2-1, downloaded 13 January 2015 (Engel et al., 2014)). We did not directly use the SNP and indel calls made by Breseq. Instead, we used the Samtools mpileup function and a custom python script to create an unfiltered list of the calls in each population at each base pair. To call *de novo* mutations, we first filtered out fixed differences between the parents by removing all sites where the alternate allele is in the majority in at least 6 lines. We then filter error-prone sites by removing sites where the alternate allele is above 10% frequency in 5 or more populations. These errors typically arise from alignment artifacts. We called a mutation in a population when it occurred in more than 50% of the reads, with support for the

alternate allele in at least 4 reads. Although we are sequencing mixed-population samples, 57% of the mutations that we called were supported by 100% of the reads for that population, and 68 % were at  $\geq 90\%$  frequency.

We discarded 12 sequenced populations due to insufficient coverage and/or library prep failure. We also checked the genotypes of our founding clones at loci where the RM and BY parents differ, to verify that they matched the genotypes reported by Bloom et al. (2013). We found that 254/261 (97%) of genotypes matched those reported by Bloom et al. (2013), but 7 (3%) were incorrect. We attribute this to errors in picking clones to set up the founders for evolution. We discarded these 7 populations from the sequence data analysis.

We detected 3 SNVs that were shared among multiple descendant populations of the same founder (7 populations in total). For two of these cases, the SNV appears in one OT population and one HT population; in the third case, it appears in one OT population and two HT populations. These mutations likely arose prior to picking clones to found populations, and we discarded them from the analysis.

## Broad-sense heritability

Broad-sense heritability  $H^2$  is the fraction of observed variance in a phenotype that can be attributed to genetic differences between founders. We find the broad-sense heritability of founder fitness,  $H_X^2$ , by partitioning the total observed variance in fitness,  $\sigma_{X,t}^2$ , into the component  $\sigma_{X,\epsilon}^2$  arising from measurement error and the component  $\sigma_{X,f}^2$  arising from founder genotype. The broad-sense heritability of initial fitness is then

$$H_X^2 = \frac{\sigma_{X,f}^2}{\sigma_{X,t}^2}.$$

We estimate the components of variance according to the formulas

$$\sigma_{X,t}^2 = \frac{1}{n_g} \sum_{i=1}^{n_g} (X_i - \bar{X}_{..})^2, \quad \sigma_{X,\epsilon}^2 = \frac{1}{n_g} \sum_{i=1}^{n_g} \sigma_{X,\epsilon,i}^2, \quad \sigma_{X,f}^2 = \sigma_{X,t}^2 - \sigma_{X,\epsilon}^2. \quad (1)$$

Here  $n_g = 230$  is the number of founders and we denote the replicate fitness measurement  $k$  of founder  $i$  by  $X_{ik}$ . We have also defined  $X_i \equiv \bar{X}_i = \frac{1}{n_{r,i}} \sum_{k=1}^{n_{r,i}} X_{ik}$  as the estimate of fitness of founder  $i$ ;  $\sigma_{X,\epsilon,i}^2 = \frac{1}{n_{r,i}(n_{r,i}-1)} \sum_{k=1}^{n_{r,i}} (X_{ik} - X_i)^2$  is the unbiased estimate of error variance in the fitness measurement of founder  $i$ ;  $n_{r,i}$  is the number of technical replicate measurements for founder  $i$ ; and  $\bar{X}_{..} = \frac{1}{n_g} \sum_{i=1}^{n_g} X_i$  is the mean fitness across all founders. We calculate confidence intervals for  $H^2$  using a leave- $\frac{n_g}{2}$ -out jackknife on genotypes.

Similarly, to estimate the broad-sense heritability of the fitness increment after evolution,  $H_{\Delta X}^2$ , we partition the total observed variance in fitness increment,  $\sigma_{\Delta X,t}^2$ , into the component due to measurement error plus evolutionary stochasticity (which arises due to random variation in fitness gains between populations descended from the same founder),  $\sigma_{\Delta X,p}^2$ , and the component  $\sigma_{\Delta X,f}^2$  due to systematically different fitness gains in populations descended from different founders. The

broad-sense heritability in fitness increment is then

$$H_{\Delta X}^2 = \frac{\sigma_{\Delta X, f}^2}{\sigma_{\Delta X, t}^2}.$$

We estimate the variance components as follows. The estimate of the fitness increment of population  $j$  descended from founder  $i$  is  $\Delta X_{ij} = X'_{ij} - X_i$ , where  $X_i$  is the estimate of fitness of founder  $i$  given above and  $X'_{ij}$  is estimate of final fitness of the focal population. We estimate the variance  $\sigma_{\Delta X, p}^2$  due to measurement error and evolutionary stochasticity as

$$\sigma_{\Delta X, p}^2 = \frac{1}{n} \sum_{i=1}^{n_g} \frac{n_{p,i}}{n_{p,i} - 1} \sum_{j=1}^{n_{p,i}} (\Delta X_{ij} - \overline{\Delta X}_{i.})^2,$$

where  $\overline{\Delta X}_{i.} = \frac{1}{n_{p,i}} \sum_{j=1}^{n_{p,i}} \Delta X_{ij}$  is the mean fitness increment in populations descended from founder  $i$ , and  $n$  is the total number of descendant populations. We estimate the total variance in fitness increment as

$$\sigma_{\Delta X, t}^2 = \frac{1}{n} \sum_{i=1}^{n_g} \sum_{j=1}^{n_{p,i}} (\Delta X_{ij} - \overline{\Delta X}_{..})^2,$$

where  $\overline{\Delta X}_{..} = \frac{1}{n} \sum_{i=1}^{n_g} \sum_{j=1}^{n_{p,i}} \Delta X_{ij}$  is the mean fitness increment across all populations. Finally, the variance due to founder genotype is

$$\sigma_{\Delta X, f}^2 = \sigma_{\Delta X, t}^2 - \sigma_{\Delta X, p}^2.$$

As above, we calculate confidence intervals on the estimate of  $H_{\Delta X}^2$  using a leave- $\frac{n}{2}$ -out jackknife on genotypes.

## Narrow-sense heritability

We estimate the narrow-sense heritability of two types of traits: the fitness of founding genotypes,  $X_i$ , and the fitness increment of population  $ij$ ,  $\Delta X_{ij}$ . Let the trait value of a particular individual be  $Y_i$ . Without perfect knowledge of which loci affect the trait, we can still estimate the narrow-sense heritability based on how the covariance in trait values between individuals depends on their genetic relatednesses (Yang et al., 2010; Zuk et al., 2012).

Supposing the trait  $Y_i$  was a linear combination of contributions from all loci, we have

$$Y_i = \alpha + \sum_{k=1}^m g_{ik} a_k + \epsilon_i, \quad (2)$$

where  $g_{ik} = -\frac{p}{\sqrt{mp(1-p)}}$  if individual  $i$  carries the RM allele at locus  $k$  or  $g_{ik} = \frac{1-p}{\sqrt{mp(1-p)}}$  if it carries the BY allele at locus  $k$ ,  $p$  is the frequency of the BY allele at locus  $k$ , and  $m$  is the total number of loci. We denote the contribution of allele  $k$  to the trait as  $a_k$ . If we take this to be a

random effects model, with  $a \sim N(0, \sigma_a^2)$  and  $\epsilon \sim N(0, \sigma_e^2)$ , then the variance-covariance matrix  $\mathbf{V}$  of  $Y_i$  is  $\mathbf{V} = \mathbf{R}\sigma_a^2 + \mathbf{I}\sigma_e^2$  (Yang et al., 2010), where  $R_{ij} = \sum_k g_{ik} g_{jk}$  is the relatedness between two segregants. The narrow-sense heritability is then  $h^2 = \frac{\sigma_a^2}{\text{Var}(Y)}$ , the ratio of the additive variance to the total phenotypic variance.

We fit  $\sigma_a^2$  using standard REML optimization, and estimated  $\hat{h}^2 = \frac{\hat{\sigma}_a^2}{\text{Var}(Y)}$ . To maintain consistency, we calculated confidence intervals using a leave- $\frac{n}{2}$ -out jackknife on segregants.

## Mapping QTLs

Following Bloom et al. (2013), we took an iterative approach to identify QTLs for a trait. As before, let  $Y_i$  be the phenotypic trait value for founder  $i$ . At each iteration we detect one QTL, so that after completing iteration  $k$ , we will have identified  $k$  QTLs. At iteration  $k + 1$ , we first fit the linear model

$$Y_i = \alpha^{(k)} + \sum_{\ell=1}^k g_{i\ell} a_{\ell}^{(k)} + \epsilon_i^{(k)}. \quad (3)$$

Here  $\alpha^{(k)}$  and all  $a_{\ell}^{(k)}$  are fitting parameters and  $\epsilon_i^{(k)}$  are noise terms, which are normally distributed random variables with mean 0 and variance  $\sigma_{\epsilon,k}^2$ . As before,  $g_{i\ell}$  denotes the genotype of founder  $i$  at locus  $\ell$ . Note that, at the first iteration, the second term in equation (3) is absent. We then calculate the residuals  $y_i^{(k+1)} = Y_i - \left( \hat{\alpha}^{(k)} + \sum_{\ell=1}^k g_{i\ell} \hat{a}_{\ell}^{(k)} \right)$ , where the hat symbol denotes the fitted parameters. Next, for each locus  $\ell$ , we calculate the log of the odds (LOD) score as  $-n_g/2 \log_{10}(1 - r_{k,\ell}^2)$ , where  $r_{k,\ell}^2$  is the Pearson correlation coefficient between the allele at locus  $\ell$  and  $y_i^{(k+1)}$ , and  $n_g$  is the number of founders. For this correlation analysis, we weigh observations by the square root of the number of technical replicate measurements. Next, we perform a permutation test (by permuting  $y_i^{(k+1)}$  values) to determine whether the QTL with the largest value of the test statistic is significant at the 0.05 level. If it is, it becomes the  $k + 1$ th QTL, and we proceed to the next iteration. If it is not, QTL detection is terminated. At each round, we calculate a confidence interval for the location of the QTL based on an LOD decline of 1.5.

We carry out this QTL detection procedure separately for two traits, initial fitness  $X$  and fitness increment  $\Delta X$ , in each of the two environments, OT and HT.

## Fitness models for adaptability

We model the dependence of adaptability on fitness using the standard linear regression,

$$\Delta X_i = \alpha + \beta X_i + \epsilon_i, \quad (4)$$

where  $\Delta X_i = \frac{1}{n_i} \sum_{j=1}^{n_i} X'_{ij} - X_i$  is the mean fitness increment of founder  $i$ , and  $X_i$  is the fitness of founder  $i$ .

Our null model is that the true fitness gains are independent of the founder fitnesses. However, our estimates of  $\Delta X_i$  also include measurement error, and these errors are not independent of the

measurement errors in  $X_i$ . These errors could generate spurious correlations between  $\Delta X_i$  and  $X_i$ . Note that we expect this effect to be small, because the error variance in  $X_i$  is 0.5% of the total variance in  $X_i$  at OT and 0.8% at HT. To assess the influence that these spurious correlations could have had on our results, we also fit the model

$$\Delta X_i = \alpha + \beta \tilde{X}_i + \epsilon_i, \quad (5)$$

where  $\tilde{X}_i = X_i + \delta_i$ ,  $\delta_i \sim N(\sigma_{X,\epsilon,i}^2, 0)$ , where  $\sigma_{X,\epsilon,i}^2$  is the error variance in founder fitness  $i$ , as defined above. This additional error lowers the correlation from 0.522 to 0.518 at HT and 0.417 to 0.415 at OT.

To assess the extent to which fitness in either environment predicts fitness changes in the other condition, we fit the model

$$\Delta X_{i,a} = \alpha + \beta X_i + \gamma Y_i + \epsilon_i, \quad (6)$$

where  $\Delta X_{i,a}$  is the fitness increment of population  $ij$  in the ‘away’ environment, in which it did not evolve,  $X_i$  is the founder fitness in the away environment, and  $Y_i$  is the founder fitness in the home environment. As above, to control for spurious correlations due to experimental noise, we also fit

$$\Delta X_{ij,a} = \alpha + \beta \tilde{X}_i + \gamma Y_i + \epsilon_i. \quad (7)$$

We assessed the significance of each coefficient in both models.

## Combined QTL and fitness model

To determine whether any loci influence adaptability over and above fitness, we created a master list of all distinct QTLs detected for the initial fitness or fitness increment as traits. We tested whether each of these loci significantly improved predictions of delta fitness in both environments. We also included terms for potential pairwise interactions between the largest-effect QTL and the others. Specifically, we fit the model

$$\Delta X_i = \alpha + \beta X_i + \gamma g^* + \sum_{\ell=1}^k g_{i\ell} a_{\ell} + \sum_{\ell=1}^k g^* g_{i\ell} b_{\ell} + \epsilon_i, \quad (8)$$

where  $g^*$  is an indicator variable on the largest-effect QTL, taking values 0.5 or  $-0.5$ ; the  $g_{i\ell}$  are indicator variables on the previously identified QTLs, also taking values 0.5 or  $-0.5$ , and  $\alpha$ ,  $\beta$ ,  $\gamma$ ,  $a_{\ell}$ , and  $b_{\ell}$  are coefficients.

We fit this model for fitness increment in each environment separately. In each case, we evaluated the significance of the coefficients using a Bonferroni-corrected F-test. We refit the model including only terms with significant coefficients to determine the best predictor of delta fitness in each environment (Figure 3, Source Data 1).

To check for additional loci that influenced adaptability over and above fitness, we repeated the QTL detection procedure described in the previous section, taking the trait to be residual differences

in adaptability beyond those explained by initial fitness. We did not find any additional QTLs beyond those previously identified.

We repeated this analysis for fitness increment in the alternative condition (Figure 7, Source Data 3).

## Mutual Information Analysis

To detect associations between the properties of a population and the *de novo* mutations that occur during adaptation, we used a test statistic based on mutual information. For clarity, we will first define the mutual information between a property and mutations in one gene, and then describe how we combine the information from all the genes. Let  $W$  be the property, with groups  $W_1, \dots, W_n$  (for example, if the property is the evolution condition, then we have  $W_1 = \text{HT}$ ,  $W_2 = \text{OT}$ ). Let our gene of interest be  $g_l$ , and let  $m$  be an indicator variable with value 1 when a *de novo* mutation was called in a population in this gene, 0 otherwise. Then the mutual information between the treatment  $W$  and gene  $g_l$  is

$$I(W, g_l) = \sum_{W=(W_1, \dots, W_n)} p(W) \sum_{m=(0,1)} p(m|W) \log_2 \frac{p(m|W)}{p(m)}, \quad (9)$$

where we estimate the probabilities based on observed counts:  $p(m)$  is the frequency of observing a mutation in  $g_l$  across all populations,  $p(m|W = W_j)$  is the frequency of observing the mutation among populations with property  $W_j$ , and  $p(W = W_j)$  is the proportion of populations with property  $W_j$ .

We will also often be interested in the mutual information conditional on a second property  $Z$ . This will allow us to determine whether a property carries additional information after we have already taken a known predictor into account. This can be calculated as

$$I(W, g_l|Z) = \sum_{Z=(Z_1, \dots, Z_q)} p(Z) \sum_{W=(W_1, \dots, W_n)} p(W|Z) \sum_{m=(0,1)} p(m|W, Z) \log_2 \frac{p(m|W, Z)}{p(m|Z)}. \quad (10)$$

As our test statistic, we take the sum of the mutual information across all of the genes

$$M(W|Z) = \sum_{g_l} I(W, g_l|Z), \quad (11)$$

where for generality we have included the possibility of conditioning on one or more factors. Let  $W = Kr$  be a population's *KRE33* allele, which can be either RM or BY. Let  $W = E$  be the evolution environment, and let  $W = F$  be the population's founding genotype. Then we calculate  $M(Kre)$ ,  $M(E|Kre)$ , and  $M(F|Kre, E)$ .

We calculate the null distributions of these statistics by permuting mutations among populations, holding the number of mutations per population fixed. We report the mutual information as  $M(Kre) - \bar{M}_p(Kre)$ , where  $\bar{M}_p(Kre)$  is the mean of the null distribution;  $M(E|Kre) - \bar{M}_p(E|Kre)$ ,



and  $M(F|Kre, E) - \bar{M}_p(F|Kre, E)$ , with 95% confidence intervals calculated from the null distributions (Source Data 2).

## Comparing QTL locations and *de novo* mutations

To ask whether we see multi-hit mutations near QTL loci more often than we would expect, we determined whether there was an enrichment of common members between the list of 27 multi-hit genes and the list of 99 genes within QTL confidence intervals. Because we excluded dubious ORFs from both lists, we took the number of genes in the yeast genome to be 5858. We computed the expected number of common members to be 0.95.

# Acknowledgments

We thank Benjamin Good and Andrew Murray for helpful comments and suggestions, and Alex Nguyen Ba for technical help. This work was supported by a National Science Foundation Graduate Research Fellowship (to E.R.J.), a Burroughs Wellcome Career Award at the Scientific Interface (to S. K.), by National Institutes of Health Grant R01 GM102308 and the Howard Hughes Medical Institute (L.K.), and by the Simons Foundation (grant 376196), grant PHY 1313638 from the NSF, and grant R01 GM104239 from the NIH (M.M.D.). Computational work in this study was performed on the Odyssey cluster supported by the Research Computing Group at Harvard University.

## References

- ADAMS, A., GOTTSCHLING, D. E., KAISER, C. A., AND STEARNS, T. 1998. Methods in yeast genetics: a Cold Spring Harbor Laboratory course manual, volume 12. Cold Spring Harbor Laboratory Press Cold Spring Harbor, NY:.
- ARAYA, C. L., FOWLER, D. M., CHEN, W., MUNIEZ, I., KELLY, J. W., AND FIELDS, S. 2012. A fundamental protein property, thermodynamic stability, revealed solely from large-scale measurements of protein function. *Proc Natl Acad Sci USA* 109:16858–16863.
- BABU, M., ARNOLD, R., BUNDALOVIC-TORMA, C., GAGARINOVA, A., WONG, K. S., KUMAR, A., STEWART, G., SAMANFAR, B., AOKI, H., WAGIH, O., ET AL. 2014. Quantitative genome-wide genetic interaction screens reveal global epistatic relationships of protein complexes in *Escherichia coli*. *PLoS Genet* 10:e1004120.
- BARRICK, J. E., KAUTH, M. R., STRELIOFF, C. C., AND LENSKI, R. E. 2010. *Escherichia coli* *rpoB* mutants have increased evolvability in proportion to their fitness defects. *Mol Biol Evol* 27:1338–1347.
- BAYM, M., KRYAZHIMSKIY, S., LIEBERMAN, T. D., CHUNG, H., DESAI, M. M., AND KISHONY, R. 2015. Inexpensive multiplexed library preparation for megabase-sized genomes. *PLoS One* 10:e0128036.
- BECKS, L. AND AGRAWAL, A. F. 2012. The evolution of sex is favoured during adaptation to new environments. *PLoS Biol* 10:e1001317.
- BLOOM, J. S., EHRENREICH, I. M., LOO, W. T., LITE, T.-L. V., AND KRUGLYAK, L. 2013. Finding the sources of missing heritability in a yeast cross. *Nature* 494:234–237.
- BLOOM, J. S., KOTENKO, I., SADHU, M. J., TREUSCH, S., ALBERT, F. W., AND KRUGLYAK, L. 2015. Genetic interactions contribute less than additive effects to quantitative trait variation in yeast. *Nature communications* 6.
- BLOUNT, Z. D., BARRICK, J. E., DAVIDSON, C. J., AND LENSKI, R. E. 2012. Genomic analysis of a key innovation in an experimental *Escherichia coli* population. *Nature* 489:513–518.
- BLOUNT, Z. D., BORLAND, C. Z., AND LENSKI, R. E. 2008. Historical contingency and the evolution of a key innovation in an experimental population of *Escherichia coli*. *Proc Natl Acad Sci USA* 105:7899–7906.
- BOLGER, A. M., LOHSE, M., AND USADEL, B. 2014. Trimmomatic: a flexible trimmer for Illumina sequence data. *Bioinformatics* p. btu170.
- BRIDGHAM, J. T., ORTLUND, E. A., AND THORNTON, J. W. 2009. An epistatic ratchet constrains the direction of glucocorticoid receptor evolution. *Nature* 461:515–519.
- BURCH, C. L. AND CHAO, L. 2000. Evolvability of an RNA virus is determined by its mutational neighbourhood. *Nature* 406:625–628.
- CHOU, H.-H., CHIU, H.-C., DELANEY, N. F., SEGRÈ, D., AND MARX, C. J. 2011. Diminishing returns epistasis among beneficial mutations decelerates adaptation. *Science* 332:1190–1192.

- CILIBERTI, S., MARTIN, O. C., AND WAGNER, A. 2007. Robustness can evolve gradually in complex regulatory gene networks with varying topology. *PLoS Comput Biol* 3:e15.
- COLEGRAVE, N. 2002. Sex releases the speed limit on evolution. *Nature* 420:664–666.
- COOPER, T. F. 2007. Recombination speeds adaptation by reducing competition between beneficial mutations in populations of *Escherichia coli*. *PLoS Biol* 5:e225.
- COSTANZO, M., BARYSHNIKOVA, A., BELLAY, J., KIM, Y., SPEAR, E. D., SEVIER, C. S., DING, H., KOH, J. L., TOUFIGHI, K., MOSTAFAVI, S., ET AL. 2010. The genetic landscape of a cell. *Science* 327:425–431.
- COSTANZO, M., VANDERSLUIS, B., KOCH, E. N., BARYSHNIKOVA, A., PONS, C., TAN, G., WANG, W., USAJ, M., HANCHARD, J., LEE, S. D., PELECHANO, V., STYLES, E. B., BILLMANN, M., VAN LEEUWEN, J., VAN DYK, N., LIN, Z.-Y., KUZMIN, E., NELSON, J., PIOTROWSKI, J. S., SRIKUMAR, T., BAHR, S., CHEN, Y., DESHPANDE, R., KURAT, C. F., LI, S. C., LI, Z., USAJ, M. M., OKADA, H., PASCOE, N., SAN LUIS, B.-J., SHARIFPOOR, S., SHUTERIQUI, E., SIMPKINS, S. W., SNIDER, J., SURESH, H. G., TAN, Y., ZHU, H., MALOD-DOGNIN, N., JANJIC, V., PRZULJ, N., TROYANSKAYA, O. G., STAGLJAR, I., XIA, T., OHYA, Y., GINGRAS, A.-C., RAUGHT, B., BOUTROS, M., STEINMETZ, L. M., MOORE, C. L., ROSEBROCK, A. P., CAUDY, A. A., MYERS, C. L., ANDREWS, B., AND BOONE, C. 2016. A global genetic interaction network maps a wiring diagram of cellular function. *Science* 353:1381.
- COUCE, A. AND TENAILLON, O. A. 2015. The rule of declining adaptability in microbial evolution experiments. *Frontiers in genetics* 6:99.
- COWPERTHWAIT, M. C., ECONOMO, E. P., HARCOTBE, W. R., MILLER, E. L., AND MEYERS, L. A. 2008. The ascent of the abundant: how mutational networks constrain evolution. *PLoS Comput Biol* 4:e1000110.
- DEATHERAGE, D. E. AND BARRICK, J. E. 2014. Identification of mutations in laboratory-evolved microbes from next-generation sequencing data using breseq. *Engineering and Analyzing Multicellular Systems: Methods and Protocols* pp. 165–188.
- DRAGHI, J. A., PARSONS, T. L., WAGNER, G. P., AND PLOTKIN, J. B. 2010. Mutational robustness can facilitate adaptation. *Nature* 463:353–355.
- ENGEL, S. R., DIETRICH, F. S., FISK, D. G., BINKLEY, G., BALAKRISHNAN, R., COSTANZO, M. C., DWIGHT, S. S., HITZ, B. C., KARRA, K., NASH, R. S., ET AL. 2014. The reference genome sequence of *Saccharomyces cerevisiae*: then and now. *G3: Genes, Genomes, Genetics* 4:389–398.
- GODDARD, M. R., GODFRAY, H. C. J., AND BURT, A. 2005. Sex increases the efficacy of natural selection in experimental yeast populations. *Nature* 434:636–640.
- GONG, L. I., SUCHARD, M. A., AND BLOOM, J. D. 2013. Stability-mediated epistasis constrains the evolution of an influenza protein. *eLife* 2:e00631.
- GOOD, B. H. AND DESAI, M. M. 2014. The impact of macroscopic epistasis on long-term evolutionary dynamics. *Genetics* 199:177–190.
- GRAY, J. C. AND GODDARD, M. R. 2012. Sex enhances adaptation by unlinking beneficial from detrimental mutations in experimental yeast populations. *BMC Evolutionary Biology* 12:43.

- HARMS, M. J. AND THORNTON, J. W. 2014. Historical contingency and its biophysical basis in glucocorticoid receptor evolution. *Nature* 512:203–207.
- HIETPAS, R. T., JENSEN, J. D., AND BOLON, D. N. 2011. Experimental illumination of a fitness landscape. *Proc Natl Acad Sci USA* 108:7896–7901.
- JACQUIER, H., BIRGY, A., LE NAGARD, H., MECHULAM, Y., SCHMITT, E., GLODT, J., BERCOT, B., PETIT, E., POULAIN, J., BARNAUD, G., ET AL. 2013. Capturing the mutational landscape of the beta-lactamase TEM-1. *Proc Natl Acad Sci USA* 110:13067–13072.
- JAROSZ, D. F. AND LINDQUIST, S. 2010. Hsp90 and environmental stress transform the adaptive value of natural genetic variation. *Science* 330:1820–1824.
- JASNOS, L. AND KORONA, R. 2007. Epistatic buffering of fitness loss in yeast double deletion strains. *Nat Genet* 39:550–554.
- KHAN, A. I., DINH, D. M., SCHNEIDER, D., LENSKE, R. E., AND COOPER, T. F. 2011. Negative epistasis between beneficial mutations in an evolving bacterial population. *Science* 332:1193–1196.
- KIRSCHNER, M. AND GERHART, J. 1998. Evolvability. *Proc Natl Acad Sci USA* 95:8420–8427.
- KRYAZHIMSKIY, S., RICE, D. P., JERISON, E. R., AND DESAI, M. M. 2014. Global epistasis makes adaptation predictable despite sequence-level stochasticity. *Science* 344:1519–1522.
- KVITEK, D. J. AND SHERLOCK, G. 2013. Whole genome, whole population sequencing reveals that loss of signaling networks is the major adaptive strategy in a constant environment. *PLoS Genetics* 9:1–11.
- LANG, G. I., BOTSTEIN, D., AND DESAI, M. M. 2011. Genetic variation and the fate of beneficial mutations in asexual populations. *Genetics* 188:647–661.
- LANG, G. I., RICE, D. P., HICKMAN, M. J., SODERGREN, E., WEINSTOCK, G. M., BOTSTEIN, D., AND DESAI, M. M. 2013. Pervasive genetic hitchhiking and clonal interference in forty evolving yeast populations. *Nature* 500:571–574.
- LAURING, A. S., FRYDMAN, J., AND ANDINO, R. 2013. The role of mutational robustness in RNA virus evolution. *Nat Rev Microbiol* 11:327–336.
- MASEL, J. AND BERGMAN, A. 2003. The evolution of the evolvability properties of the yeast prion  $[PSI^+]$ . *Evolution* 57:1498–1512.
- MASEL, J. AND TROTTER, M. V. 2010. Robustness and evolvability. *Trends Genet* 26:406–414.
- MCDONALD, M. J., HSIEH, Y.-Y., YU, Y.-H., CHANG, S.-L., AND LEU, J.-Y. 2012. The evolution of low mutation rates in experimental mutator populations of *Saccharomyces cerevisiae*. *Curr Biol* 22:1235–1240.
- MCDONALD, M. J., RICE, D. P., AND DESAI, M. M. 2016. Sex speeds adaptation by altering the dynamics of molecular evolution. *Nature* 531:233–236.
- MONTVILLE, R., FROISSART, R., REMOLD, S. K., TENAILLON, O., AND TURNER, P. E. 2005. Evolution of mutational robustness in an RNA virus. *PLoS Biol* 3:e381.

- PERFEITO, L., SOUSA, A., BATAILLON, T., AND GORDO, I. 2014. Rates of fitness decline and rebound suggest pervasive epistasis. *Evolution* 68:150–162.
- QUANDT, E. M., DEATHERAGE, D. E., ELLINGTON, A. D., GEORGIU, G., AND BARRICK, J. E. 2014. Recursive genomewide recombination and sequencing reveals a key refinement step in the evolution of a metabolic innovation in *Escherichia coli*. *Proc Natl Acad Sci USA* 111:2217–2222.
- QUANDT, E. M., GOLLIHAR, J., BLOUNT, Z. D., ELLINGTON, A. D., GEORGIU, G., AND BARRICK, J. E. 2015. Fine-tuning citrate synthase flux potentiates and refines metabolic innovation in the Lenski evolution experiment. *eLife* 4:e09696.
- SALVERDA, M. L., DELLUS, E., GORTER, F. A., DEBETS, A. J., VAN DER OOST, J., HOEKSTRA, R. F., TAWFIK, D. S., AND DE VISSER, J. A. G. 2011. Initial mutations direct alternative pathways of protein evolution. *PLoS Genet* 7:e1001321.
- SNIEGOWSKI, P. D., GERRISH, P. J., AND LENSKI, R. E. 1997. Evolution of high mutation rates in experimental populations of *E.coli*. *Nature* 387:703–705.
- SOYER, O. S. AND PFEIFFER, T. 2010. Evolution under fluctuating environments explains observed robustness in metabolic networks. *PLoS Comput Biol* 6:e1000907.
- STERN, A., BIANCO, S., TE YEH, M., WRIGHT, C., BUTCHER, K., TANG, C., NIELSEN, R., AND ANDINO, R. 2014. Costs and benefits of mutational robustness in RNA viruses. *Cell Reports* 8:1026–1036.
- SZAMECZ, B., BOROSS, G., KALAPIS, D., KOVÁCS, K., FEKETE, G., FARKAS, Z., LÁZÁR, V., HRTYAN, M., KEMMEREN, P., KOERKAMP, M. J. G., ET AL. 2014. The genomic landscape of compensatory evolution. *PLoS Biol* 12:e1001935.
- SZAPPANOS, B., KOVÁCS, K., SZAMECZ, B., HONTI, F., COSTANZO, M., BARYSHNIKOVA, A., GELIUS-DIETRICH, G., LERCHER, M. J., JELASITY, M., MYERS, C. L., ET AL. 2011. An integrated approach to characterize genetic interaction networks in yeast metabolism. *Nat Genet* 43:656–662.
- VAN NIMWEGEN, E., CRUTCHFIELD, J. P., AND HUYNEN, M. 1999. Neutral evolution of mutational robustness. *Proc Natl Acad Sci USA* 96:9716–9720.
- VAN OPIJNEN, T., BODI, K. L., AND CAMILLI, A. 2009. Tn-seq: high-throughput parallel sequencing for fitness and genetic interaction studies in microorganisms. *Nat Methods* 6:767–772.
- VENKATARAM, S., DUNN, B., LI, Y., AGARWALA, A., CHANG, J., EBEL, E., GEILER-SAMEROTTE, K., HÉRISSANT, L., BLUNDELL, J., LEVY, S., FISHER, D., SHERLOCK, G., AND PETROV, D. 2016. Development of a comprehensive genotype-to-fitness map of adaptation-driving mutations in yeast. *Cell* 166:1585–1596.e22.
- VISSCHER, P. M., MEDLAND, S. E., FERREIRA, M. A., MORLEY, K. I., ZHU, G., CORNES, B. K., MONTGOMERY, G. W., AND MARTIN, N. G. 2006. Assumption-free estimation of heritability from genome-wide identity-by-descent sharing between full siblings. *PLoS Genet* 2:e41.
- WANG, Y., ARENAS, C. D., STOEDEL, D. M., FLYNN, K., KNAPP, E., DILLON, M. M., WÜNSCHE, A., HATCHER, P. J., MOORE, F. B.-G., COOPER, V. S., ET AL. 2016. Benefit of



- transferred mutations is better predicted by the fitness of recipients than by their ecological or genetic relatedness. *Proc Natl Acad Sci USA* 113:5047–5052.
- WEINREICH, D., WATSON, R., AND CHAO, L. 2005. Sign epistasis and genetic constraint on evolutionary trajectories. *Evolution* 59:1165.
- WEINREICH, D. M., DELANEY, N. F., DEPRISTO, M. A., AND HARTL, D. L. 2006. Darwinian evolution can follow only very few mutational paths to fitter proteins. *Science* 312:111–114.
- WIELGOSS, S., BARRICK, J. E., TENAILLON, O., WISER, M. J., DITTMAR, W. J., CRUVEILLER, S., CHANE-WOON-MING, B., MÉDIGUE, C., LENSKI, R. E., AND SCHNEIDER, D. 2013. Mutation rate dynamics in a bacterial population reflect tension between adaptation and genetic load. *Proc Natl Acad Sci USA* 110:222–227.
- WILKE, C. O., WANG, J. L., OFRIA, C., LENSKI, R. E., AND ADAMI, C. 2001. Evolution of digital organisms at high mutation rates leads to survival of the flattest. *Nature* 412:331–333.
- WOODS, R. J., BARRICK, J. E., COOPER, T. F., SHRESTHA, U., KAUTH, M. R., AND LENSKI, R. E. 2011. Second-order selection for evolvability in a large *Escherichia coli* population. *Science* 331:1433–1436.
- WÜNSCHE, A., DINH, D. M., SATTERWHITE, R. S., ARENAS, C. D., STOEBEL, D. M., AND COOPER, T. F. 2017. Diminishing-returns epistasis decreases adaptability along an evolutionary trajectory. *Nature Ecology & Evolution* 1:0061.
- XIAO, Y., ROUZINE, I. M., BIANCO, S., ACEVEDO, A., GOLDSTEIN, E. F., FARKOV, M., BRODSKY, L., AND ANDINO, R. 2016. RNA recombination enhances adaptability and is required for virus spread and virulence. *Cell Host Microbe* 19:493–503.
- YANG, J., BENYAMIN, B., MCEVOY, B. P., GORDON, S., HENDERS, A. K., NYHOLT, D. R., MADDEN, P. A., HEATH, A. C., MARTIN, N. G., MONTGOMERY, G. W., ET AL. 2010. Common snps explain a large proportion of the heritability for human height. *Nature genetics* 42:565–569.
- ZEYL, C. AND BELL, G. 1997. The advantage of sex in evolving yeast populations. *Nature* 388:465–468.
- ZUK, O., HECHTER, E., SUNYAEV, S. R., AND LANDER, E. S. 2012. The mystery of missing heritability: Genetic interactions create phantom heritability. *Proc Natl Acad Sci USA* 109:1193–1198.

|                                        | Fitness<br>at OT        | Fitness<br>at HT        | Adaptability<br>at OT   | Adaptability<br>at HT   | Pleiotropy<br>HT pops at OT | Pleiotropy<br>OT pops at HT |
|----------------------------------------|-------------------------|-------------------------|-------------------------|-------------------------|-----------------------------|-----------------------------|
| $H^2$                                  | 0.995<br>(0.992, 0.997) | 0.992<br>(0.988, 0.994) | 0.613<br>(0.541, 0.672) | 0.654<br>(0.586, 0.716) | 0.622<br>(0.552, 0.680)     | 0.291<br>(0.193, 0.394)     |
| $h^2$                                  | 0.837<br>(0.639, 0.964) | 0.805<br>(0.555, 0.936) | 0.460<br>(0.280, 0.582) | 0.440<br>(0.173, 0.595) | 0.477<br>(0.308, 0.636)     | 0.091<br>(0, 0.228)         |
| $r^2$ , QTL models                     | 0.760<br>(0.712, 0.820) | 0.761<br>(0.707, 0.823) | 0.303<br>(0.232, 0.388) | 0.318<br>(0.242, 0.340) | NA                          | NA                          |
| $r^2$ , founder fitness                | NA                      | NA                      | 0.417<br>(0.352, 0.478) | 0.522<br>(0.451, 0.585) | 0.425<br>(0.361, 0.492)     | 0.127<br>(0.082, 0.182)     |
| Added variance<br>fitness vs. QTLs     | NA                      | NA                      | 0.105<br>(0.047)        | 0.199<br>(0.143)        | NA                          | NA                          |
| $r^2$ , combined models                | NA                      | NA                      | 0.501<br>(0.442, 0.561) | 0.577<br>(0.510, 0.641) | 0.467<br>(0.411, 0.534)     | 0.171<br>(0.126, 0.235)     |
| Added variance<br>combined vs. fitness | NA                      | NA                      | 0.087<br>(0.060)        | 0.057<br>(0.035)        | 0.047<br>(0.021)            | 0.044<br>(0.022)            |

**Table 1.** Heritability of fitness, adaptability, and pleiotropy, along with the fraction of variance explained by QTL, fitness, and combined models. Row 5 represents the median added variance explained by the fitness model over the QTL model under a jackknife over segregants (Methods); Row 7 similarly represents the added variance explained by the combined model over the fitness model. Paired numbers in parentheses denote 95% confidence intervals; single numbers in parentheses denote lower bounds (5th percentile) on added variances.

| Locus         | Genes within confidence interval                                                                                                                                                                                                                                                           | Fitness at OT | Fitness at HT | Adaptability at OT | Adaptability at HT | Significantly affects adaptability (above fitness), OT | Significantly affects adaptability (above fitness), HT | Significantly affects pleiotropy (above fitness) HT pops at OT | Significantly affects pleiotropy (above fitness) OT pops at HT |
|---------------|--------------------------------------------------------------------------------------------------------------------------------------------------------------------------------------------------------------------------------------------------------------------------------------------|---------------|---------------|--------------------|--------------------|--------------------------------------------------------|--------------------------------------------------------|----------------------------------------------------------------|----------------------------------------------------------------|
| ChrXIV 376315 | FYV6, <b>KRE33</b> , TOM22, CPT1                                                                                                                                                                                                                                                           | y             | y             | y                  | y                  | y                                                      | y                                                      | n                                                              | y                                                              |
| ChrXV 154799  | WRS1, COQ3, HM11, RFC4, TRM10 YPQ1, SPO21, MSH2, HAL9, MPD2 DUF1, MHF2, ADH1, PHM7, ATG34, ATG19, <b>IRA2</b> , REX4, AVO1, ATP19, BRX1                                                                                                                                                    | y             | y             | y                  | n                  | n                                                      | y                                                      | n                                                              | y                                                              |
| ChrVII 123335 | NCS6, YPT32, MIG2, SIP2, SPT16 CHC1, POX1, YGL204C, KEX1, ARO8 MCM6, EMP24.YIP4, MDS3, DSD1, GCN1, YGL194C-A, HOS2, YGL193C, IME4, COX13, CDC55, RPS26A, YGL188C-A, COX4, TPN1, YGL185C, STR3, MND1, YGL182C GTS1, ATG1, TOS3                                                              | y             | n             | n                  | n                  | n                                                      | n                                                      | n                                                              | n                                                              |
| ChrXIV 470303 | MIC27, OCA1, <b>RAS2</b> , YNL097C-B, PHO23 RPS7B, APP1, YPT53, YNL092W, NST1, RHO2, TOP2, TCB2, TCB2, SNN1, MKT1, END3, SAL1, PMS1, SWS2, EOS1, TPM1, NIS1, APJ1, MKS1 IMP4, MLF3, MSK1, RNH201, LAT1                                                                                     | y             | n             | n                  | n                  | y                                                      | y                                                      | n                                                              | y                                                              |
| ChrXII 646707 | RCK2, YEF3, SSP120, SYM1, MCP2 NDL1, HAP1, YLR257W, GSY1, HSP60 LCB5, YPT6, TMA7, RED1, RPS28B, YLR264C-A, NEJ1, PDR8                                                                                                                                                                      | y             | n             | n                  | n                  | y                                                      | n                                                      | y                                                              | y                                                              |
| ChrIV 1062759 | HDA2, MHR1, SUR2, ATP5, <b>BFR2</b> PRO1, CFT1, GPI11, RSC3, CPR5, HNT2, YDR306C, PMT7, SRB7, GIC2, SUM1, TFB1, SSF2, PIB1, RAD34 IPK1, OMS1, HIM1, MCM21, YFT2, SWA2, DAD4, YDR320W-B, ASP1                                                                                               | y             | n             | y                  | n                  | n                                                      | n                                                      | n                                                              | n                                                              |
| ChrXII 210540 | SSL1, SSK1, NSE1, PAM18 RLP24, TEN1, LOT6, YLR012C, GAT3, PPR1, BRE2, PML1, MEU1, POM34, PSR2, YEH2, IRC25, SDO1, IZH3 UBR2, SNF7, SED5, AAT2, ADE16, RPL15A, YLR030W, YLR031W, RAD5, RSC58, SMF3, MLH2, YLR036C, PAU23                                                                    | n             | n             | y                  | y                  | y                                                      | n                                                      | y                                                              | n                                                              |
| ChrXIV 254149 | POP1, ADE12, ALG9, MGS1, YNL217W, RAP1, IES2, PEX17, RRG9, VID27, YNL211C, MER1, SSB2, YNL208W, RIO2, RTT106, SPS18, SPS19, PSY2, NNR1, GCR2, WHB3, SLZ1, YNL195C, YNL194C, YNL193W, CHS1, DUG3, YNL190W, SRP1, KAR1, SWT21, UBP10, MRPL19, YNL184C, NPRI1, IPI3, PBR1, RHO5, RPS3, MRPL22 | n             | y             | n                  | n                  | n                                                      | n                                                      | y                                                              | y                                                              |

**Table 2.** QTL locations, genes within confidence intervals, and traits that this QTL affects. Genes associated with multi-hit mutations are in bold.

|                  | <i>KRE33</i> -RM     |                         | <i>KRE33</i> -BY     |                         |
|------------------|----------------------|-------------------------|----------------------|-------------------------|
|                  | Evolved at OT        | Evolved at HT           | Evolved at OT        | Evolved at HT           |
| Fitness at OT, % | 8.33<br>(8.27, 8.38) | 8.86<br>(8.81, 8.92)    | 5.01<br>(4.94, 5.07) | 4.83<br>(4.76, 4.90)    |
| Fitness at HT, % | 9.57<br>(9.42, 9.77) | 20.33<br>(20.18, 20.53) | 6.25<br>(6.12, 6.38) | 11.51<br>(11.38, 11.64) |

**Table 3.** Average fitness increments of populations in home and away environments, in percent. Numbers in parentheses denote 95% confidence intervals.

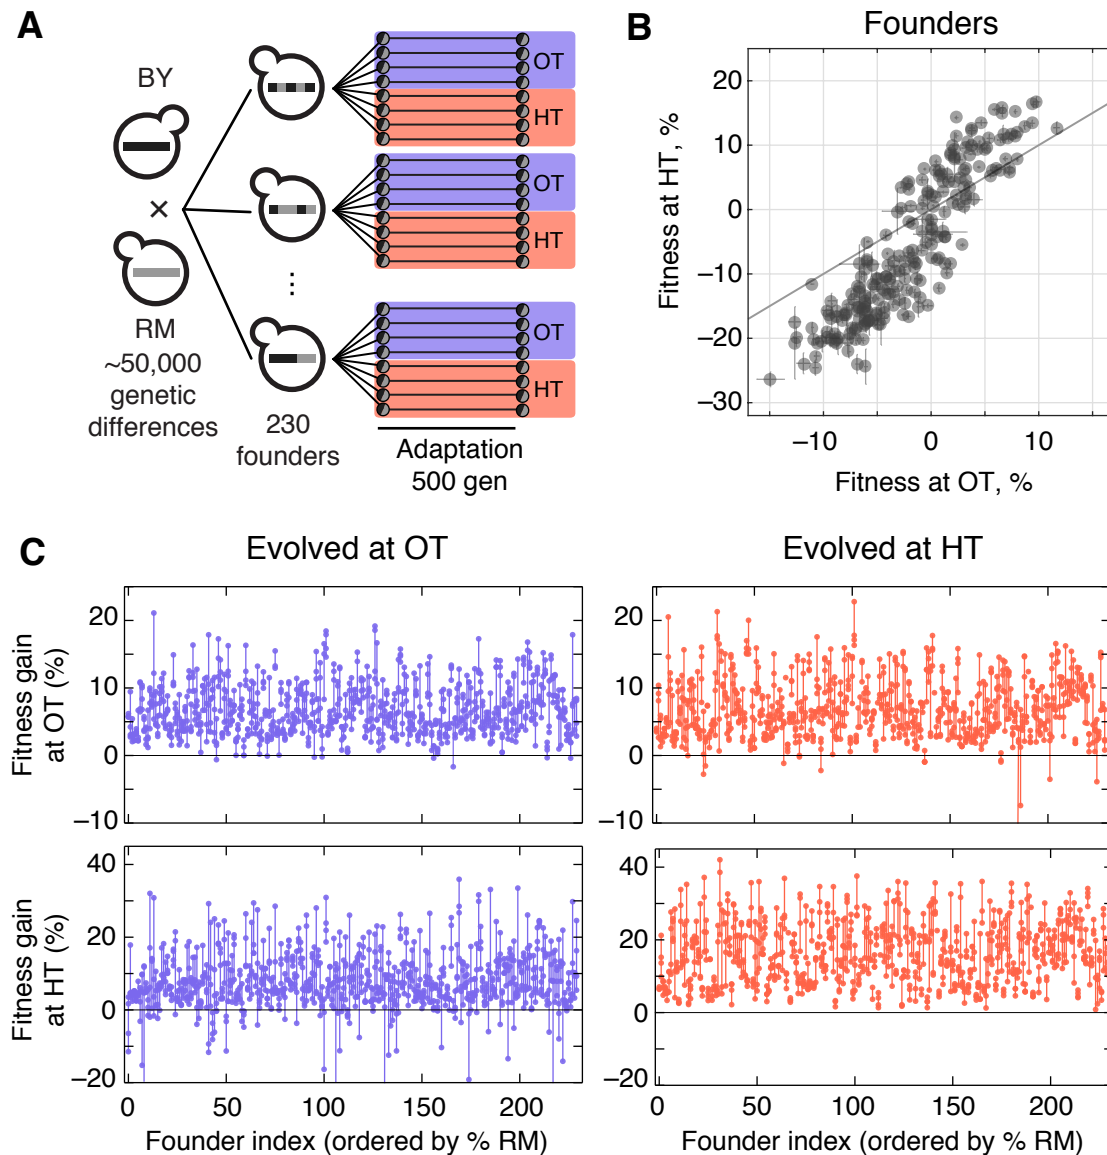

**Figure 1. Experimental design and fitness gains in evolved populations.** (A) Schematic of the experimental design. (B) Fitness of all 230 founders at both OT and HT. (C) Fitness of all evolved lines in both OT and HT environments, after 500 generations of adaptation in one of the environments. Each point represents the fitness of one population; vertical lines connect populations descended from the same founder. Founders are ordered by the fraction of their genome derived from the RM parent.

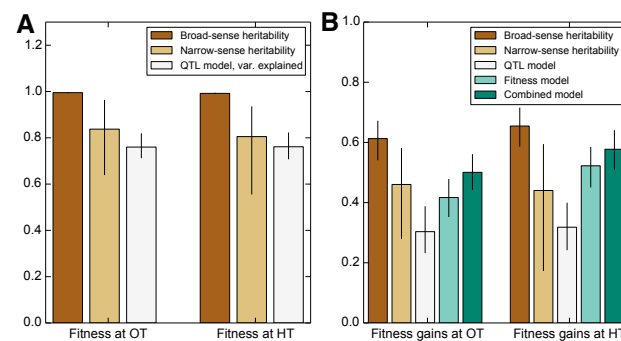

**Figure 2. Heritability of fitness and adaptability.** Tan bars denote broad-sense and narrow sense heritability of (A) founder fitness and (B) fitness gain after evolution in the indicated environment (i.e. adaptability). White bars denote the heritability explained by a linear model based on the QTLs identified as affecting initial fitness or adaptability (Methods). Green bars indicate the heritability of adaptability explained by initial fitness in that condition. Error bars indicate 95% confidence intervals.



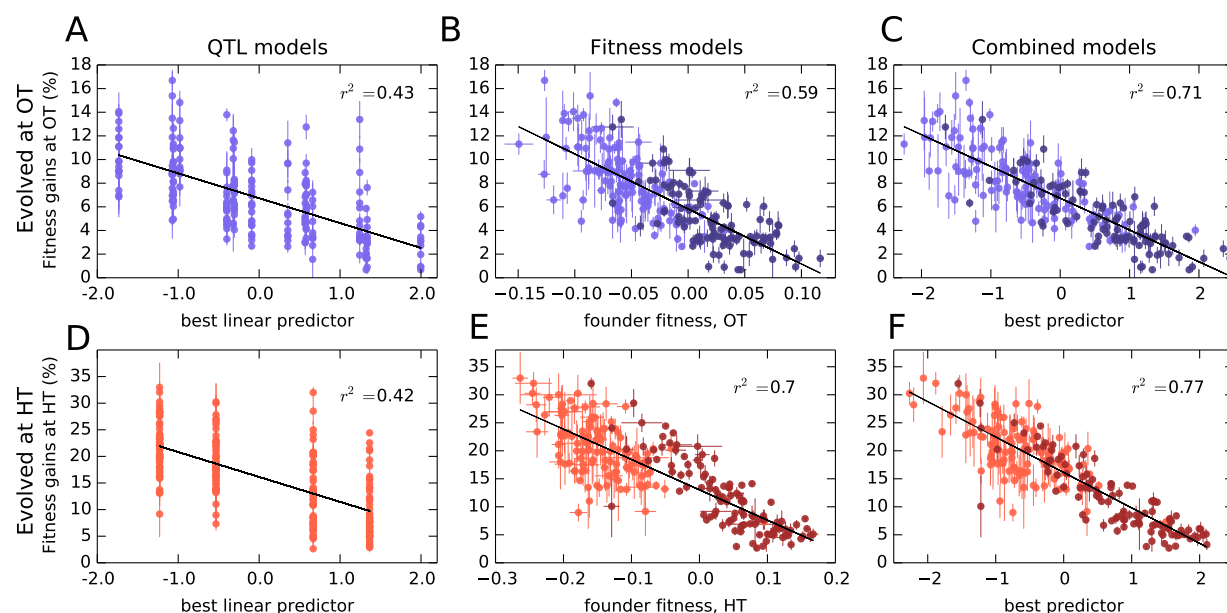

**Figure 3. Models to predict adaptability.** Each point represents the average fitness change of four populations descended from the same founder after 500 generations of evolution in the (A-C) OT environment or (D-F) HT environment. Error bars denote  $\pm 1$  s.e.m. Lines show the predictions of different models;  $r^2$  indicates the fraction of the variance explained, which is similar to the fraction of the broad-sense heritability explained by the model. (A,D) Linear QTL model, where the  $x$ -axis is the linear combination of identified QTLs that best predicts the fitness gains in each environment. (B,E) Model where founder fitness is used as predictor for fitness gain. (C,F) Combined model, where the  $x$ -axis is the linear combination of initial fitness and the identified QTLs that best predicts the fitness gains in each environment. Dark and light shades represent BY and RM alleles at the *KRE33* locus respectively. For model parameters, see Source Data 1.

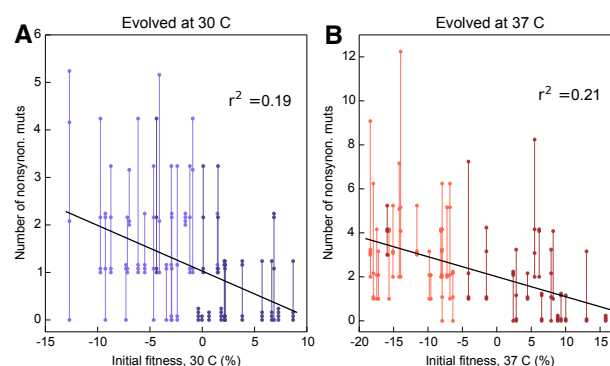

**Figure 4. Number of fixed nonsynonymous mutations.** Each point represents the number of fixed nonsynonymous mutations in a population evolved at (A) OT or (B) HT. Populations descended from the same founder are connected by vertical lines for visual convenience, with founders ordered according to their fitness in the corresponding environment. Dark and light shades represent BY and RM alleles at the *KRE33* locus respectively.

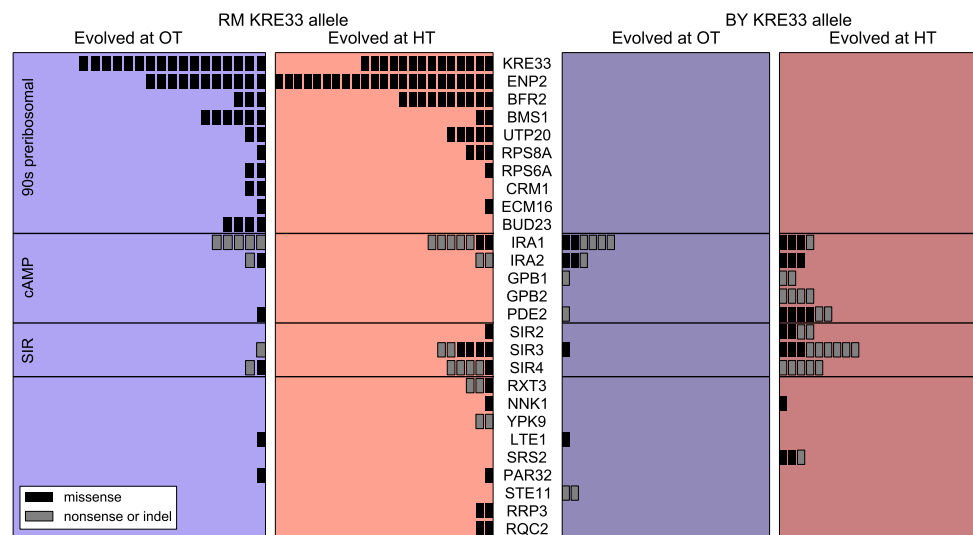

**Figure 5. Distribution of mutations in multi-hit genes across evolved populations.** The number of sequenced populations with a *de novo* mutation in each multi-hit gene, for each environment and founder *KRE33* identity. Genes are organized by functional groups. For mutual information metrics, see Source Data 2.

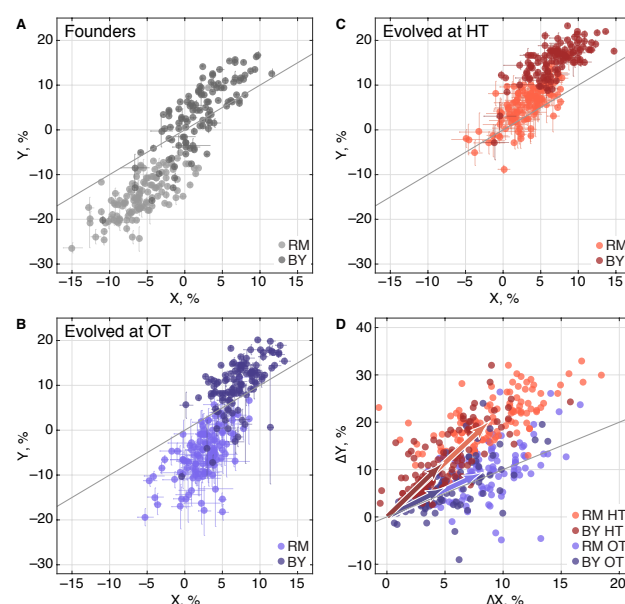

**Figure 6. Pleiotropic consequences of adaptation.** (A) The fitness of each founder in the OT environment ( $X$ ) and HT environment ( $Y$ ). Error bars represent  $\pm 1$  s.e.m. over technical replicates. Dark and light points represent strains carrying the BY and RM alleles at the *KRE33* locus respectively. (B,C) Average fitness of all populations descended from each founder. Error bars represent  $\pm 1$  s.e.m. over replicate populations. Orange and blue colors represent strains evolved at HT and OT, respectively; dark and light shades represent BY and RM alleles at the *KRE33* locus respectively. (D) Average fitness increment of all populations descended from each founder; error bars omitted for clarity. Arrows point to the centroids of the respective point clouds.

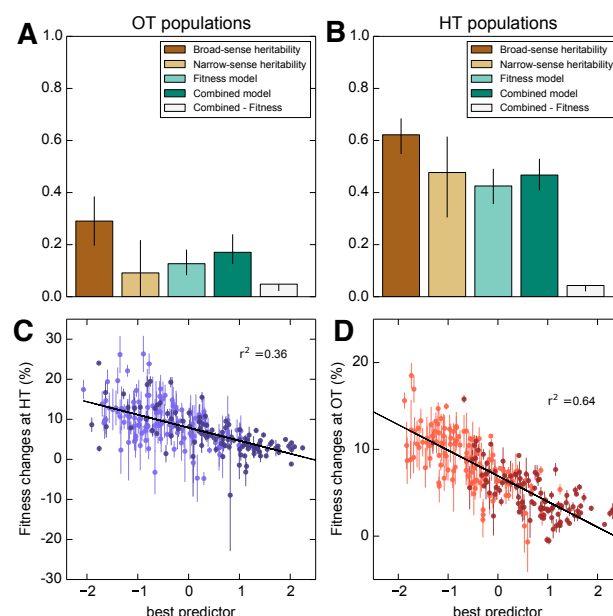

**Figure 7. Heritability and predictability of pleiotropic fitness gains.** (A) Heritability of the fitness gains in the HT environment after evolution at OT,  $\Delta_{OT}Y$ , and the variance explained by fitness and combined fitness/QTL models. The final (grey) bar indicates the median difference in variance explained between the combined fitness/QTL model and the fitness model under jackknife resampling (Methods). (B) Heritability of  $\Delta_{HT}X$  and the variance explained by fitness and combined fitness/QTL models. The final (grey) bar is as in A. (C) Predicted and actual values of  $\Delta_{OT}Y$  based on initial fitness at HT and QTL loci (Table 2, column 9). Each point shows the mean over populations descended from the same founder. Error bars denote  $\pm 1$  s.e.m. over technical replicates ( $x$ -axis) or over replicate evolved populations ( $y$ -axis). Dark and light points represent strains carrying the BY and RM alleles at the *KRE33* locus respectively. (D) Predicted and actual values of  $\Delta_{HT}X$  based on initial fitness at OT and QTL loci (Table 2, column 10). For model parameters, see Source Data 3.

## Source Data and Supplementary Files

### Source Data 1

Parameters for combined fitness and QTL models for adaptability.

### Source Data 2

Mutual information between *de novo* mutations and the *KRE33* allele, the evolution environment, and the genotype.

### Source Data 3

Parameters for combined fitness and QTL models for pleiotropy.

### Supplementary File 1: Segregant genotypes

Genotypes of segregants used in this study. Note this data is reproduced from Bloom et al. (2013), with marker loci that are redundant for this subset of the segregant panel removed.

### Supplementary File 2: Fitness measurements

Fitness measurements in the OT and HT environments for each founder and descendant population.

### Supplementary File 3: Table of *de novo* mutations

All mutations called at frequencies of  $\geq 50\%$  in evolved populations.

### Supplementary File 4: pEJ03-mCitrine-KanMX-HO

Annotated sequence for pEJ03-mCitrine-KanMX-HO.
